# Supplementary material for: Green biosynthesis of CuO & Ag–CuO nanoparticles from Malus domestica leaf extract and evaluation of antibacterial, antioxidant and DNA cleavage activities
Source: Royal Society of Chemistry journal article supplement (doi:10.1039/c7nj02977b), 2017-11-08
Supplement: c7nj02977b1.pdf [file c7nj02977b1.pdf]

## Electronic Supplementary Information

### Green Biosynthesis of CuO & Ag-CuO nanoparticles from *Malus Domestica* leaf extract and evaluation of antibacterial, antioxidant, DNA cleavage activities

Mangesh S. Jadhav, Sameer. Kulkarni, Prasad. Raikar, Delicia A. Barretto,  
Shyam Kumar. Vootla and U. S. Raikar

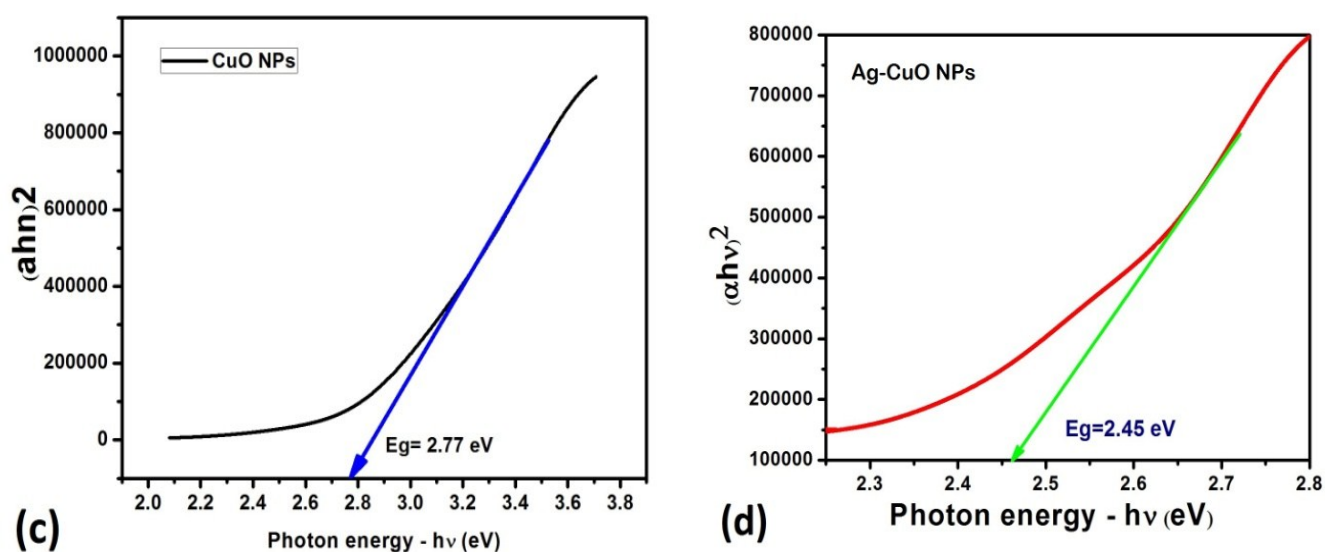

**Fig. S1:** Tauc plot of CuO and Ag-CuO nanoparticles for determination of band gap

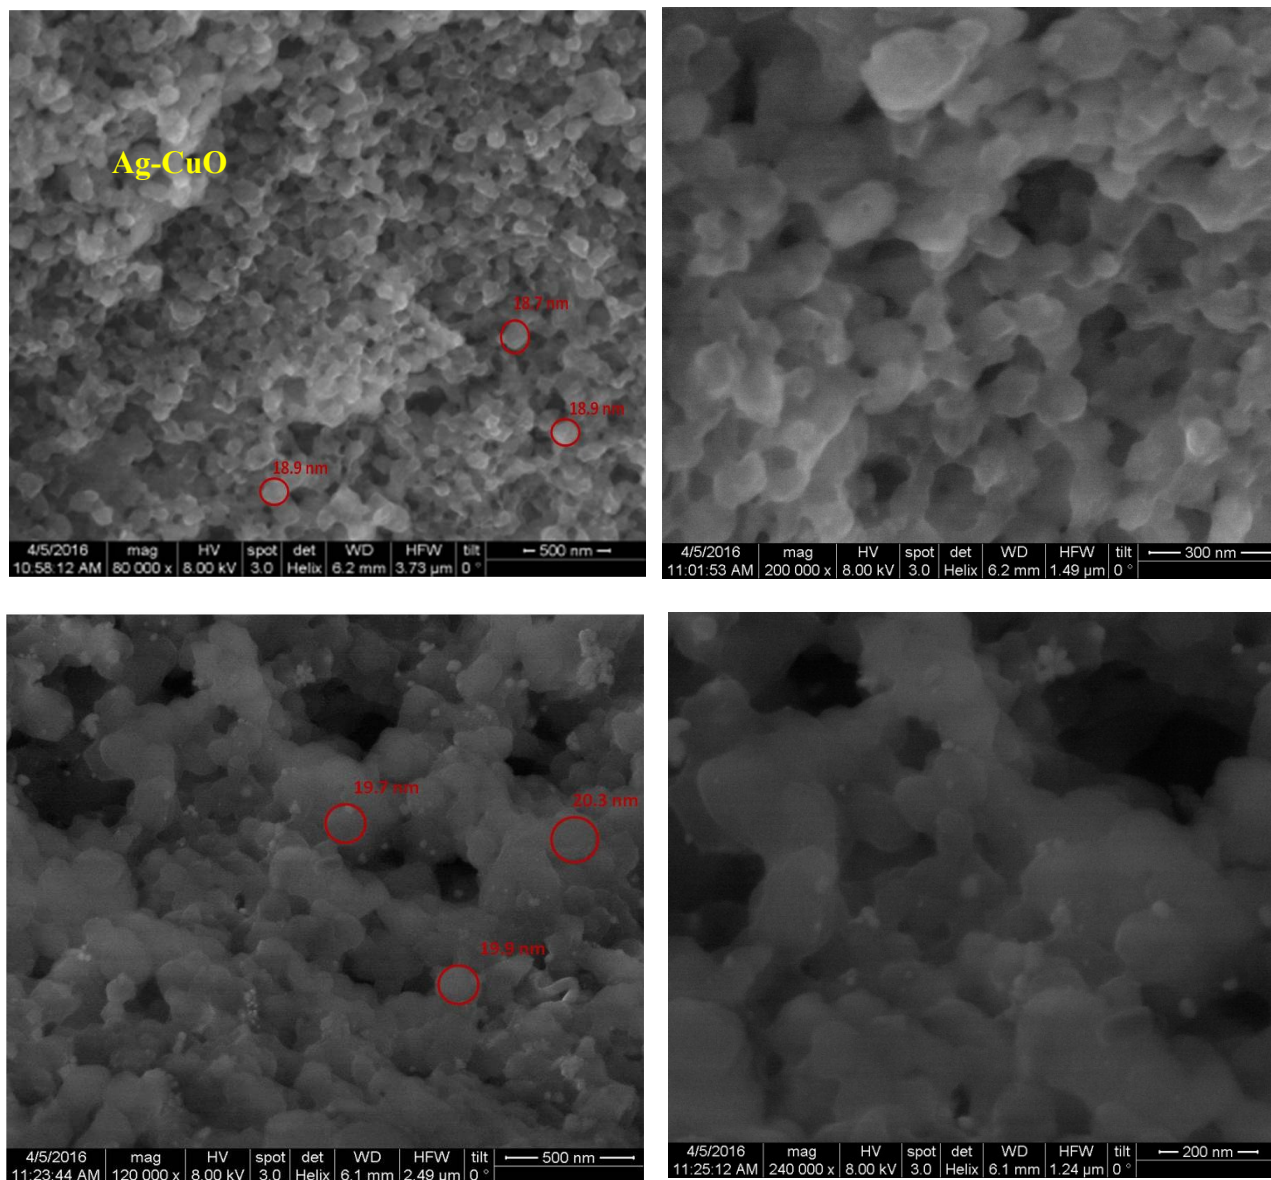

**Fig.S2.** Scanning electron microscopy (SEM) of CuO and Ag-CuO nanoparticles.

**Table.S1:** Elemental composition of (a) CuO & (b) Ag-CuO nanoparticles using EDS analysis.

| <i>Element</i> | <i>Wt %</i> | <i>At %</i> | <i>K-Ratio</i> |
|----------------|-------------|-------------|----------------|
| <i>CK</i>      | 66.34       | 74.96       | 0.387          |
| <i>OK</i>      | 27.9        | 23.66       | 0.0635         |
| <i>PK</i>      | 0.18        | 0.08        | 0.0015         |
| <i>SK</i>      | 0.53        | 0.22        | 0.0048         |
| <i>CuK</i>     | 5.06        | 1.08        | 0.0401         |

**(a)**

| <i>Element</i> | <i>Wt %</i> | <i>At %</i> | <i>K-Ratio</i> |
|----------------|-------------|-------------|----------------|
| <i>CK</i>      | 46.63       | 71.65       | 0.2805         |
| <i>OK</i>      | 18.93       | 21.84       | 0.0366         |
| <i>AgL</i>     | 29.22       | 5           | 0.2515         |
| <i>CuK</i>     | 5.22        | 1.51        | 0.0445         |

**(b)**
